# Supplementary material for: A Nationwide Antenatal Human T-Cell Leukemia Virus Type-1 Antibody Screening in Japan
Source: Front Microbiol. 2020 Apr 9;11:595. doi: 10.3389/fmicb.2020.00595 (PMC7160230; doi:10.3389/fmicb.2020.00595)
Supplement: Supplementary file 1 [file Table_1.xlsx]

## Sheet: STBF (4-6months)
Table S1. Summary of the characteristics of the four included studies about the MTCT risk by short-term breastfeeding during 6 months or less compared to that of exclusive formula feeding
Author, year	Study area	Study period	Study population	Exclusion		Exclusive formula feeding				short-term breast feeding (6 months oe less)				Longer-term breastfeeding				Timing of antibody test of infants	Study Design
						Inclusion	Number	Seroconversion n/N (%)		Inclusion	Number	Seroconversion n/N (%)		Inclusion	Number	Seroconversion n/N (%)
Takahashi, 1991	Kagoshima, Japan (13 hospitals)	1985-1990	Sibilings of infants born to HTLV-1 carrier mothers	Children who were married or who had a history of blood transfusion or surgery		formula-fed infants	0	0 (0%)		BF≤6 months	67	3 (4.5%)		>6 months	136	19 (14.0%)		>24 months	Retrospective
Takahashi, 1991	Kagoshima, Japan (13 hospitals)	1986-1990	Infants born to HTLV-1 carrier mothers			formula-fed infants	151	9 (6.0%)		BF≤6 months	23	1 (4.3%)		>6 months	3	1 (33.3%)		>12 months	Prospectiver
Nakayama, 1992	Kagoshima, Japan (single center survey)	1986-1990	Formula-fed infants: infants born to HTLV-1 carrier mother=49, older siblings=4 breast-fed infants: older siblings			formula-fed infants	53	1 (1.9%)		BF≤6 months	41	4 (9.8%)		7-12 months	50	7 (14.0%)		1-5 years	Retrospective
Oki, 1992	Kagoshima & Miyazaki, Japan	1986-1990	Sibilings of infants born to HTLV-1 carrier mothers	Children who were married or who had a history of blood transfusion or surgery		formula-fed infants	7	0 (0%)		BF<7 months	67	3 (4.5%)		≥7 months	136	19 (14.0%)		2-25 years	Retrospective
Oki, 1992	Kagishima & Miyazaki, Japan	1986-1991	Infants born to HTLV-1 carrier mothers			formula-fed infants	177	10 (5.6%)		BF<7 months	26	1 (3.8%)		≥7 months	4	1 (25.0%)		12-36 months	Prospectiver
Takezaki, 1997	Tsushima and Kamigoto, Nagasaki, Japan	1985-1991	Infants born to HTLV-1 carrier mothers	NA		formula-fed infants	162	4 (2.5%)		BF≤6 months	51	2 (3.9%)		>6 months	64	13 (20.3%)		≥30 months	Retrospective
Ureta-Vidal, 1999	French Guyana	1989-NA	Children born to HTLV-1 carrier mothers (including older siblings)	Children younger than 18 months, and children older than 12 years		formula-fed infants	23	0 (0%)		BF≤6 months	52	2 (3.4%)		>6 months	151	17 (11.3%)		18 months - 12 years	Retrospective
										0-3 months	35	1		7-9 months	13	1 (7.7%)
										4-6 months	17	1		10-12 months	68	1 (10.3%)
														>12 months	70	7 (12.9%)
Hinoi, 2011	Nagasaki, Japan	1987-2004	Infants born to HTLV-1 carrier mothers	NA		formula-fed infants	1152	29 (2.5%)		BF<6 months	202	15 (7.4%)		≥6 months	365	74 (20.3%)		3 years	Retrospective
	BF: breastfeeding, NA: not applicable
