# Supplementary material for: A Nationwide Antenatal Human T-Cell Leukemia Virus Type-1 Antibody Screening in Japan
Source: Front Microbiol. 2020 Apr 9;11:595. doi: 10.3389/fmicb.2020.00595 (PMC7160230; doi:10.3389/fmicb.2020.00595)
Supplement: Supplementary file 2 [file Table_2.xlsx]

## Sheet: STBF (≤3 months)
Table S2. Comparison of mother-to-child transmission rates by exclusive formula feeding, short-term breastfeeding during 3 months or less and longer-term breastfeeding
Author, year	Study area	Study period	Study population	Exclusion		Exclusive formula feeding				Short-term breastfeeding (3 months or less)				Longer-term breastfeeding				Timing of antibody test in infants and children	Study Design
						Inclusion	Number	Seroconversion n/N (%)		Inclusion	Number	Seroconversion n/N (%)		Inclusion	Number	Seroconversion n/N (%)
Ureta-Vidal, 1999	French Guyana	1989-NA	Children born to HTLV-1 carrier mothers (including older siblings)	Children younger than 18 months, and children older than 12 years		formula-fed infants	23	0 (0%)		BF≤3 months	12	1 (8.3%)		4-6 months	17	1 (5.9%)		18 months - 12 years	Retrospective
														7-9 months	13	1 (7.7%)
														10-12 months	68	7 (10.3%)
														>12 months	70	9 (12.9%)
Hirata, 1992	Ishigaki island, Okinawa, Japan	1989-1991	Children born to HTLV-1 carrier mothers (including older siblings)	Children who were married or who had a history of blood transfusion or surgery, infants less than 9 moths of life		formula-fed infants	78	10 (12.8%)		BF≤3 months	39	2 (5.1%)		4-6 months	22	5 (22.7%)		10 months to-19 years	Retrospective
														7-12 months	23	6 (26.1%)
														>12 months	13	5 (38.5%)
Kashiwagi, 2004	Okinawa, Japan	1995-1999	Children born to HTLV-1 carrier mothers (including older siblings)	Children who were married or who had a history of blood transfusion or surgery		formula-fed infants	31	1 (3.2%)		BF≤3 months	25	1 (4.0%)		4-6 months	4	0 (0%)		1-17 years	Prospective
														7-12 months	7	0 (0%)
														>12 months	9	1 (11.1%)
Takezaki, 2009	Kagoshima, Japan	1986-2006	Infants born to HTLV-1 carrier mothers	NA		formula-fed infants	331	16 (4.8%)		BF≤3 months	126	2 (1.6%)		≥4 months	46	9 (19.6%)		≥18 months	Retrospective
Moriuchi, 2017	Nagasaki, Japan	2011-2017	Infants born to HTLV-1 carrier mothers	NA		formula-fed infants	91	4 (4.4%)		BF≤90 days	35	3 (8.5%)		>3 months	21	6 (28.6%)		≥36 months	Retrospective
	BF: breastfeeding, NA: not applicable
